# Supplementary material
Source: PubMed Central journal article supplement (PMC1924555)
Supplement: pnas_0704662104_4.pdf [file pnas_0704662104_4.pdf]

**Table 3. Comparison genomes for BLAST-based mapping**

| Organism                                            | N genes | genes within home phylum |      |      | genes unassigned to known phylum |      |      |
|-----------------------------------------------------|---------|--------------------------|------|------|----------------------------------|------|------|
|                                                     |         | 30%                      | 60%  | 90%  | 30%                              | 60%  | 90%  |
| Bacillus Anthaces Ames                              | 5439    | 5230                     | 5211 | 4498 | 8                                | 15   | 57   |
| Listeria monocytogenes str. 1/2a F6854              | 3052    | 2101                     | 2086 | 2051 | 31                               | 105  | 168  |
| Fusobacterium nucleatum nucleatum ATCC 25586        | 2128    | 1574                     | 1599 | 1308 | 39                               | 372  | 758  |
| Fusobacterium nucleatum subsp. vincentii ATCC 49256 | 2327    | 1815                     | 1773 | 1404 | 46                               | 406  | 837  |
| Bacteroides thetaiotaomicron VPI-5482               | 4902    | 3331                     | 2219 | 549  | 144                              | 2414 | 4264 |
| Bacteroides fragilis NCTC9343                       | 4399    | 3751                     | 3575 | 3411 | 187                              | 682  | 896  |
| Campylobacter jejuni NCTC 11168                     | 1707    | 1578                     | 1557 | 1495 | 30                               | 85   | 159  |
| Campylobacter coli RM2228                           | 2019    | 1752                     | 1609 | 702  | 61                               | 316  | 1264 |
| Helicobacter pylori 26695                           | 1609    | 1450                     | 1412 | 929  | 39                               | 140  | 637  |
| Leptospira interrogans serovar Copenhageni Fiocruz  | 3700    | 3516                     | 3499 | 3006 | 39                               | 151  | 652  |
| Borrelia burgdorferi B31                            | 1677    | 1142                     | 887  | 343  | 171                              | 729  | 1296 |
| Dehalococcoides ethenogenes 195                     | 1629    | 1274                     | 1254 | 740  | 88                               | 273  | 840  |
| Thermus thermophilus HB8                            | 2031    | 1882                     | 1859 | 1826 | 4                                | 91   | 151  |
| TM7a                                                | 3245    |                          |      |      | 1056                             | 2476 | 3147 |

| Organism                                            | % in home phylum |       |       | % unassigned to known phylum |       |       |
|-----------------------------------------------------|------------------|-------|-------|------------------------------|-------|-------|
|                                                     | 30%              | 60%   | 90%   | 30%                          | 60%   | 90%   |
| Bacillus Anthaces Ames                              | 96.2%            | 95.8% | 82.7% | 0.1%                         | 0.3%  | 1.0%  |
| Listeria monocytogenes str. 1/2a F6854              | 68.8%            | 68.3% | 67.2% | 1.0%                         | 3.4%  | 5.5%  |
| Fusobacterium nucleatum nucleatum ATCC 25586        | 74.0%            | 75.1% | 61.5% | 1.8%                         | 17.5% | 35.6% |
| Fusobacterium nucleatum subsp. vincentii ATCC 49256 | 78.0%            | 76.2% | 60.3% | 2.0%                         | 17.4% | 36.0% |
| Bacteroides thetaiotaomicron VPI-5482               | 68.0%            | 45.3% | 11.2% | 2.9%                         | 49.2% | 87.0% |
| Bacteroides fragilis NCTC9343                       | 85.3%            | 81.3% | 77.5% | 4.3%                         | 15.5% | 20.4% |
| Campylobacter jejuni NCTC 11168                     | 92.4%            | 91.2% | 87.6% | 1.8%                         | 5.0%  | 9.3%  |
| Campylobacter coli RM2228                           | 86.8%            | 79.7% | 34.8% | 3.0%                         | 15.7% | 62.6% |
| Helicobacter pylori 26695                           | 90.1%            | 87.8% | 57.7% | 2.4%                         | 8.7%  | 39.6% |
| Leptospira interrogans serovar Copenhageni Fiocruz  | 95.0%            | 94.6% | 81.2% | 1.1%                         | 4.1%  | 17.6% |
| Borrelia burgdorferi B31                            | 68.1%            | 52.9% | 20.5% | 10.2%                        | 43.5% | 77.3% |
| Dehalococcoides ethenogenes 195                     | 78.2%            | 77.0% | 45.4% | 5.4%                         | 16.8% | 51.6% |
| Thermus thermophilus HB8                            | 92.7%            | 91.5% | 89.9% | 0.2%                         | 4.5%  | 7.4%  |
| Average (not including TM7a)                        | 82.6%            | 78.2% | 59.8% | 2.8%                         | 15.5% | 34.7% |
| TM7a                                                |                  |       |       | 32.5%                        | 76.3% | 97.0% |

Data from IMG/M.
