# Supplementary material
Source: PubMed Central journal article supplement (PMC1924555)

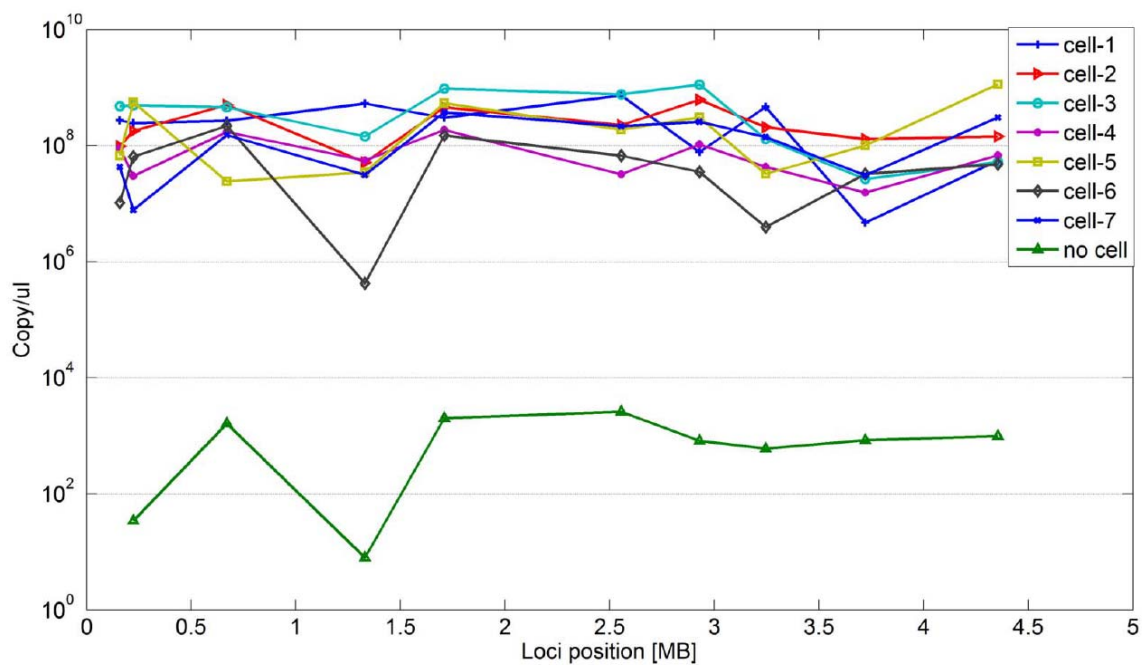

Supplement: pnas_0704662104_1.pdf [file pnas_0704662104_1.pdf]

1 2 3 4 5

12 M

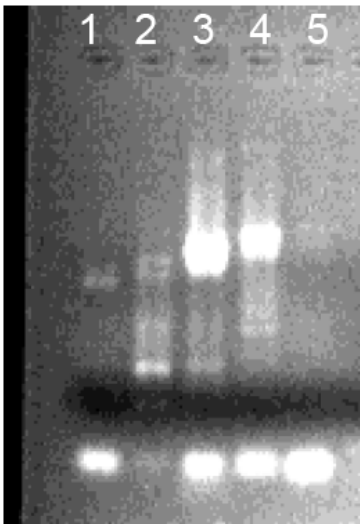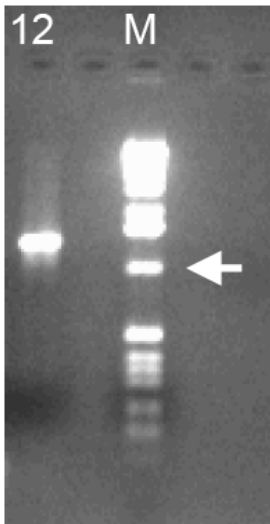

Supplement: pnas_0704662104_2.pdf [file pnas_0704662104_2.pdf]

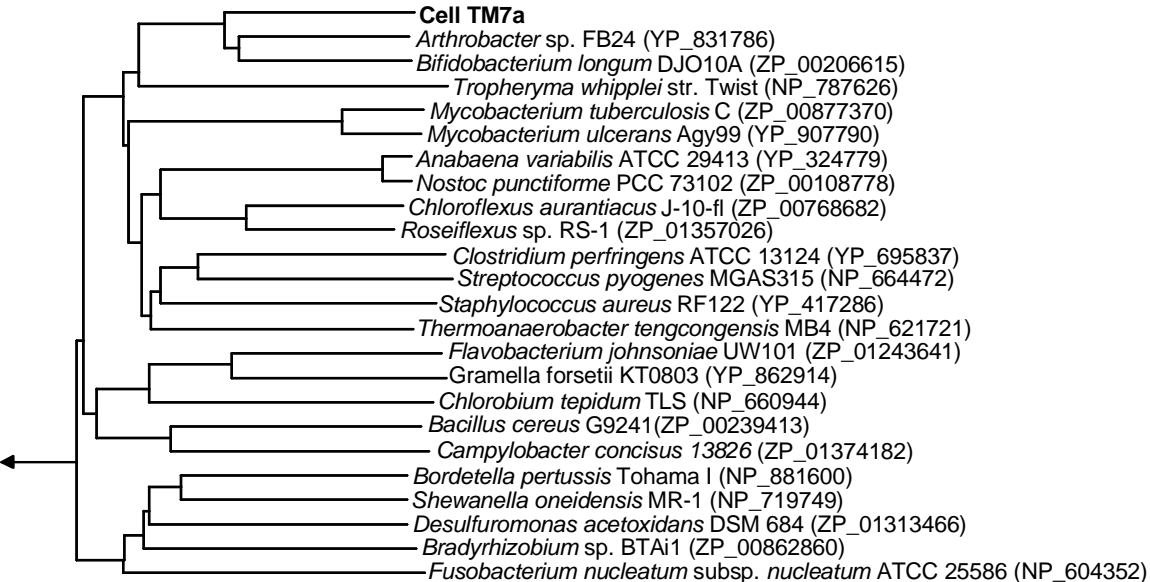

0.10

Supplement: pnas_0704662104_3.pdf [file pnas_0704662104_3.pdf]
